# Supplementary material for: Relationships among streptococci from the mitis group, misidentified as Streptococcus pneumoniae
Source: Springer Nature journal article supplement (doi:10.1007/s10096-020-03916-6), 2020-05-14
Supplement: MOESM2 [file 17983150]

Supplementary Table 2. Number of rMLST alleles shared by misID streptococci with *S. pneumoniae*

| rMLST locus | all observed rMLST alleles | alleles, shared by misID with <i>S. pneumoniae</i> | alleles unique for misID |
|-------------|----------------------------|----------------------------------------------------|--------------------------|
| BACT000001  | 591                        | 12                                                 | 98                       |
| BACT000002  | 408                        | 17                                                 | 92                       |
| BACT000003  | 220                        | 11                                                 | 63                       |
| BACT000004  | 312                        | 13                                                 | 91                       |
| BACT000005  | 134                        | 8                                                  | 30                       |
| BACT000006  | 160                        | 11                                                 | 51                       |
| BACT000007  | 206                        | 17                                                 | 74                       |
| BACT000008  | 174                        | 13                                                 | 55                       |
| BACT000009  | 216                        | 16                                                 | 60                       |
| BACT000010  | 148                        | 12                                                 | 48                       |
| BACT000011  | 89                         | 5                                                  | 13                       |
| BACT000012  | 145                        | 11                                                 | 40                       |
| BACT000013  | 125                        | 11                                                 | 27                       |
| BACT000014  | 72                         | 7                                                  | 18                       |
| BACT000015  | 124                        | 13                                                 | 41                       |
| BACT000016  | 137                        | 9                                                  | 55                       |
| BACT000017  | 73                         | 5                                                  | 19                       |
| BACT000018  | 85                         | 9                                                  | 12                       |
| BACT000019  | 109                        | 9                                                  | 27                       |
| BACT000020  | 103                        | 9                                                  | 29                       |
| BACT000021  | 46                         | 3                                                  | 11                       |
| BACT000030  | 331                        | 21                                                 | 86                       |
| BACT000031  | 366                        | 12                                                 | 43                       |
| BACT000032  | 296                        | 13                                                 | 77                       |
| BACT000033  | 291                        | 13                                                 | 68                       |
| BACT000034  | 191                        | 17                                                 | 49                       |
| BACT000035  | 231                        | 16                                                 | 70                       |
| BACT000036  | 198                        | 10                                                 | 42                       |
| BACT000038  | 194                        | 8                                                  | 80                       |
| BACT000039  | 217                        | 9                                                  | 64                       |
| BACT000040  | 150                        | 14                                                 | 41                       |
| BACT000042  | 209                        | 12                                                 | 43                       |
| BACT000043  | 106                        | 13                                                 | 30                       |
| BACT000044  | 152                        | 6                                                  | 49                       |
| BACT000045  | 141                        | 9                                                  | 33                       |
| BACT000046  | 114                        | 13                                                 | 32                       |
| BACT000047  | 127                        | 7                                                  | 18                       |
| BACT000048  | 201                        | 17                                                 | 65                       |
| BACT000049  | 174                        | 13                                                 | 48                       |
| BACT000050  | 126                        | 14                                                 | 24                       |
| BACT000051  | 168                        | 10                                                 | 31                       |
| BACT000052  | 142                        | 9                                                  | 49                       |
| BACT000053  | 167                        | 13                                                 | 55                       |
| BACT000056  | 146                        | 8                                                  | 52                       |
| BACT000057  | 50                         | 3                                                  | 17                       |
| BACT000058  | 61                         | 4                                                  | 16                       |
| BACT000059  | 65                         | 10                                                 | 15                       |
| BACT000060  | 98                         | 10                                                 | 21                       |
| BACT000061  | 64                         | 6                                                  | 14                       |
| BACT000063  | 46                         | 7                                                  | 17                       |
| BACT000064  | 55                         | 6                                                  | 12                       |
| BACT000065  | 17                         | 1                                                  | 6                        |
