# Supplementary material for: Relationships among streptococci from the mitis group, misidentified as Streptococcus pneumoniae
Source: Springer Nature journal article supplement (doi:10.1007/s10096-020-03916-6), 2020-05-14
Supplement: MOESM3 [file 17983150]

Supplementary Table 3. List of genes (in alphabetic order) constituting a core genome of misID streptococci and reference strains of *S. pneumoniae*, *S. pseudopneumoniae*, *S. mitis* and the 596553 strain.

| Gene             | Annotation (PROKKA)                                                               |
|------------------|-----------------------------------------------------------------------------------|
| <b>accA</b>      | Acetyl-coenzyme A carboxylase carboxyl transferase subunit alpha                  |
| <b>accC</b>      | Biotin carboxylase                                                                |
| <b>acpA</b>      | Acyl carrier protein                                                              |
| <b>acpS</b>      | Holo-[acyl-carrier-protein] synthase                                              |
| <b>adcB</b>      | putative zinc transport system permease protein AdcB                              |
| <b>adcC_1</b>    | putative zinc transport system ATP-binding protein AdcC                           |
| <b>adcR</b>      | Transcriptional repressor AdcR                                                    |
| <b>adk</b>       | Adenylate kinase                                                                  |
| <b>agaC</b>      | PTS system N-acetylgalactosamine-specific EIIC component 1                        |
| <b>alaA</b>      | Glutamate-pyruvate aminotransferase AlaA                                          |
| <b>aldC</b>      | Alpha-acetolactate decarboxylase                                                  |
| <b>alsT</b>      | Amino-acid carrier protein AlsT                                                   |
| <b>amyS</b>      | Alpha-amylase precursor                                                           |
| <b>ansB</b>      | L-asparaginase 2 precursor                                                        |
| <b>apt</b>       | Adenine phosphoribosyltransferase                                                 |
| <b>argR_1</b>    | Arginine regulator                                                                |
| <b>argR_2</b>    | Arginine hydroxamate resistance protein                                           |
| <b>arlR_2</b>    | Response regulator ArlR                                                           |
| <b>aroB</b>      | 3-dehydroquinate synthase                                                         |
| <b>aroC</b>      | Chorismate synthase                                                               |
| <b>aroD</b>      | 3-dehydroquinate dehydratase                                                      |
| <b>aroE</b>      | Shikimate dehydrogenase                                                           |
| <b>aroF</b>      | Phospho-2-dehydro-3-deoxyheptonate aldolase, Tyr-sensitive                        |
| <b>aroG</b>      | Phospho-2-dehydro-3-deoxyheptonate aldolase, Tyr-sensitive                        |
| <b>artM</b>      | Arginine transport ATP-binding protein ArtM                                       |
| <b>artM_1</b>    | Arginine transport ATP-binding protein ArtM                                       |
| <b>asnA</b>      | Aspartate--ammonia ligase                                                         |
| <b>asnS</b>      | Asparagine--tRNA ligase                                                           |
| <b>aspS</b>      | Aspartate--tRNA ligase                                                            |
| <b>atpA</b>      | ATP synthase subunit alpha                                                        |
| <b>atpD</b>      | ATP synthase subunit beta                                                         |
| <b>atpG</b>      | F-ATPase gamma subunit                                                            |
| <b>atpH</b>      | F-type ATPase subunit delta                                                       |
| <b>axe1-6A_1</b> | Carbohydrate acetyl esterase/feruloyl esterase precursor                          |
| <b>bgIK_2</b>    | Beta-glucoside kinase                                                             |
| <b>braC</b>      | Leucine-, isoleucine-, valine-, threonine-, and alanine-binding protein precursor |
| <b>carA</b>      | Carbamoyl-phosphate synthase small chain                                          |
| <b>carB</b>      | Carbamoyl-phosphate synthase large chain                                          |
| <b>cca</b>       | CCA-adding enzyme                                                                 |
| <b>cdsA</b>      | Phosphatidate cytidyltransferase                                                  |
| <b>clpE</b>      | ATP-dependent Clp protease ATP-binding subunit ClpE                               |
| <b>clpP</b>      | ATP-dependent Clp protease proteolytic subunit                                    |
| <b>clpX</b>      | ATP-dependent Clp protease ATP-binding subunit ClpX                               |
| <b>cmk</b>       | Cytidylate kinase                                                                 |
| <b>coaA</b>      | Pantothenate kinase                                                               |
| <b>coaBC_2</b>   | DNA/pantothenate metabolism flavoprotein                                          |

|               |                                                                  |
|---------------|------------------------------------------------------------------|
| <b>codY</b>   | GTP-sensing transcriptional pleiotropic repressor CodY           |
| <b>corA</b>   | Magnesium transport protein CorA                                 |
| <b>csbB</b>   | Putative glycosyltransferase CsbB                                |
| <b>csd</b>    | putative cysteine desulfurase                                    |
| <b>cshA_2</b> | DEAD-box ATP-dependent RNA helicase CshA                         |
| <b>ctsR</b>   | Class three stress gene repressor                                |
| <b>cysA</b>   | Sulfate/thiosulfate import ATP-binding protein CysA              |
| <b>cysB</b>   | Cys regulon transcriptional activator                            |
| <b>cysE</b>   | Serine acetyltransferase                                         |
| <b>cysK</b>   | Cysteine synthase                                                |
| <b>dapB</b>   | 4-hydroxy-tetrahydrodipicolinate reductase                       |
| <b>dapE</b>   | Succinyl-diaminopimelate desuccinylase                           |
| <b>dapH</b>   | 2,3,4,5-tetrahydropyridine-2,6-dicarboxylate N-acetyltransferase |
| <b>ddl</b>    | D-alanine--D-alanine ligase                                      |
| <b>degA</b>   | Degradation activator                                            |
| <b>deoB</b>   | Phosphopentomutase                                               |
| <b>dexB</b>   | Glucan 1,6-alpha-glucosidase                                     |
| <b>dltA</b>   | D-alanine--poly(phosphoribitol) ligase subunit 1                 |
| <b>dltC</b>   | D-alanine--poly(phosphoribitol) ligase subunit 2                 |
| <b>dnaC</b>   | Replicative DNA helicase                                         |
| <b>dnaD</b>   | DNA replication protein DnaD                                     |
| <b>dnaK</b>   | Heat shock protein 70                                            |
| <b>dnaN</b>   | DNA polymerase III subunit beta                                  |
| <b>dnaX_1</b> | DNA polymerase III subunit tau                                   |
| <b>dsbD_2</b> | Thiol:disulfide interchange protein DsbD precursor               |
| <b>dut</b>    | Deoxyuridine 5'-triphosphate nucleotidohydrolase                 |
| <b>ecfA1</b>  | Energy-coupling factor transporter ATP-binding protein EcfA1     |
| <b>ecfA2</b>  | Energy-coupling factor transporter ATP-binding protein EcfA2     |
| <b>ecfT_1</b> | Energy-coupling factor transporter transmembrane protein EcfT    |
| <b>efp</b>    | Elongation factor P                                              |
| <b>endA</b>   | Competence-specific nuclease                                     |
| <b>engB</b>   | putative GTP-binding protein EngB                                |
| <b>epsF</b>   | type IV pilin biogenesis protein                                 |
| <b>era</b>    | GTPase Era                                                       |
| <b>exoA</b>   | Exodeoxyribonuclease                                             |
| <b>fabF</b>   | 3-oxoacyl-[acyl-carrier-protein] synthase 2                      |
| <b>fabH</b>   | 3-oxoacyl-[acyl-carrier-protein] synthase 3                      |
| <b>fabM</b>   | Trans-2-decenoyl-[acyl-carrier-protein] isomerase                |
| <b>fabZ</b>   | 3-hydroxyacyl-[acyl-carrier-protein] dehydratase FabZ            |
| <b>fieF</b>   | Ferrous-iron efflux pump FieF                                    |
| <b>fmt</b>    | Methionyl-tRNA formyltransferase                                 |
| <b>frr</b>    | Ribosome-releasing factor                                        |
| <b>ftsE</b>   | Cell division ATP-binding protein FtsE                           |
| <b>ftsK</b>   | DNA translocase FtsK                                             |
| <b>ftsY</b>   | Signal recognition particle receptor FtsY                        |
| <b>galK_1</b> | Galactokinase                                                    |
| <b>galK_2</b> | Galactokinase                                                    |
| <b>gap</b>    | Glyceraldehyde-3-phosphate dehydrogenase                         |
| <b>gatB</b>   | Aspartyl/glutamyl-tRNA(Asn/Gln) amidotransferase subunit B       |
| <b>gatC_1</b> | Glutamyl-tRNA(Gln) amidotransferase subunit C                    |

|                    |                                                               |
|--------------------|---------------------------------------------------------------|
| <b>glcK</b>        | Glucokinase                                                   |
| <b>glgA</b>        | Glycogen synthase                                             |
| <b>glgD</b>        | Glycogen biosynthesis protein GlgD                            |
| <b>glmU</b>        | Bifunctional protein GlmU                                     |
| <b>glnH</b>        | Arginine-binding extracellular protein ArtP precursor         |
| <b>glnP_2</b>      | Glutamine transport system permease protein GlnP              |
| <b>glnR</b>        | HTH-type transcriptional regulator GlnR                       |
| <b>gloA</b>        | Lactoylglutathione lyase                                      |
| <b>glpK</b>        | Glycerol kinase                                               |
| <b>glpO</b>        | Alpha-glycerophosphate oxidase                                |
| <b>gltC</b>        | HTH-type transcriptional regulator GltC                       |
| <b>glyS</b>        | Glycine--tRNA ligase beta subunit                             |
| <b>gmk</b>         | Guanylate kinase                                              |
| <b>gmuF</b>        | putative mannose-6-phosphate isomerase GmuF                   |
| <b>gnd</b>         | 6-phosphogluconate dehydrogenase, decarboxylating             |
| <b>gph</b>         | Phosphoglycolate phosphatase                                  |
| <b>gpmA_1</b>      | 2,3-bisphosphoglycerate-dependent phosphoglycerate mutase     |
| <b>gpmA_2</b>      | 2,3-bisphosphoglycerate-dependent phosphoglycerate mutase     |
| <b>gpsA</b>        | Glycerol-3-phosphate dehydrogenase [NAD(P) ]                  |
| <b>graR</b>        | Glycopeptide resistance-associated protein R                  |
| <b>graS</b>        | Sensor histidine kinase GraS                                  |
| <b>groL</b>        | Stress protein H5                                             |
| <b>group_1492</b>  | R3H domain protein                                            |
| <b>group_1515</b>  | coproporphyrinogen III oxidase                                |
| <b>group_1588</b>  | hypothetical protein                                          |
| <b>group_1767</b>  | DegV domain-containing protein                                |
| <b>group_1816</b>  | S4 domain protein YaaA                                        |
| <b>group_1818</b>  | Putative glutamine amidotransferasec                          |
| <b>group_1831</b>  | UGMP family protein                                           |
| <b>group_1859</b>  | hypothetical protein                                          |
| <b>group_1894</b>  | putative integral membrane protein                            |
| <b>group_1910</b>  | putative ABC transporter ATP-binding protein                  |
| <b>group_1974</b>  | phosphodiesterase                                             |
| <b>group_2013</b>  | hypothetical protein                                          |
| <b>group_2136</b>  | DNA-directed RNA polymerase subunit beta                      |
| <b>group_2154</b>  | hypothetical protein                                          |
| <b>group_2155</b>  | hypothetical protein                                          |
| <b>group_2157</b>  | hypothetical protein                                          |
| <b>group_2241</b>  | Colicin V production protein                                  |
| <b>group_2253</b>  | RmuC family protein                                           |
| <b>group_23020</b> | hypothetical protein                                          |
| <b>group_23071</b> | preprotein translocase subunit SecG                           |
| <b>group_23093</b> | putative ABC transporter ATP-binding protein                  |
| <b>group_23095</b> | FeS assembly SUF system protein                               |
| <b>group_23100</b> | ABC-type uncharacterized transport system, permease component |
| <b>group_23112</b> | Phosphotransferase enzyme family protein                      |
| <b>group_23121</b> | preprotein translocase subunit SecE                           |
| <b>group_2396</b>  | Putative peptidyl-prolyl cis-trans isomerase                  |
| <b>group_2419</b>  | putative membrane protein                                     |
| <b>group_2436</b>  | phosphoglycolate phosphatase                                  |

|                   |                                                                  |
|-------------------|------------------------------------------------------------------|
| <b>group_2611</b> | Putative O-methyltransferase/MSMEI_4947                          |
| <b>group_2637</b> | putative response regulatory protein                             |
| <b>group_2649</b> | DNA-binding transcriptional repressor PuvR                       |
| <b>group_2652</b> | hypothetical protein                                             |
| <b>group_2654</b> | putative cyanate transporter                                     |
| <b>group_2741</b> | DNA-binding transcriptional repressor FabR                       |
| <b>group_2753</b> | D-alanyl-lipoteichoic acid biosynthesis protein DltB             |
| <b>group_2783</b> | hypothetical protein                                             |
| <b>group_2803</b> | putative membrane protein                                        |
| <b>group_3002</b> | Putative hydrolase                                               |
| <b>group_3004</b> | hypothetical protein                                             |
| <b>group_3049</b> | GTPase YqeH                                                      |
| <b>group_3076</b> | carboxylate/amino acid/amine transporter                         |
| <b>group_3216</b> | putative ABC transporter ATP-binding protein                     |
| <b>group_3311</b> | hypothetical protein                                             |
| <b>group_3355</b> | hypothetical protein                                             |
| <b>group_3455</b> | hypothetical protein                                             |
| <b>group_3488</b> | putative peroxidase-related enzyme                               |
| <b>group_3496</b> | putative alkylphosphonate utilization operon protein PhnA        |
| <b>group_3497</b> | hypothetical protein                                             |
| <b>group_3512</b> | hypothetical protein                                             |
| <b>group_3601</b> | ABC-type uncharacterized transport system, periplasmic component |
| <b>group_3603</b> | 37-kD nucleoid-associated bacterial protein                      |
| <b>group_3749</b> | putative bicarbonate transporter, IctB family                    |
| <b>group_3992</b> | hypothetical protein                                             |
| <b>group_4247</b> | hemolysin                                                        |
| <b>group_4248</b> | Ribosome-associated factor Y                                     |
| <b>group_4307</b> | Putative universal stress protein                                |
| <b>group_4625</b> | hypothetical protein                                             |
| <b>group_4678</b> | glmZ(sRNA)-inactivating NTPase                                   |
| <b>group_4687</b> | Putative tRNA (cytidine(34)-2'-O)-methyltransferase              |
| <b>group_4702</b> | hypothetical protein                                             |
| <b>group_5030</b> | transcriptional repressor DtcA                                   |
| <b>group_5059</b> | LemA family protein                                              |
| <b>group_528</b>  | putative PEP-CTERM system TPR-repeat lipoprotein                 |
| <b>group_5435</b> | hypothetical protein                                             |
| <b>group_5462</b> | hypothetical protein                                             |
| <b>group_5470</b> | Calcium-transporting ATPase                                      |
| <b>group_5504</b> | hypothetical protein                                             |
| <b>group_5555</b> | hypothetical protein                                             |
| <b>group_5556</b> | Nitronate monooxygenase                                          |
| <b>group_5978</b> | putative DNA-binding protein                                     |
| <b>group_5982</b> | hypothetical protein                                             |
| <b>group_6037</b> | Cobalt-dependent inorganic pyrophosphatase                       |
| <b>group_6085</b> | Flavodoxin                                                       |
| <b>group_6129</b> | lineage-specific thermal regulator protein                       |
| <b>group_6669</b> | hypothetical protein                                             |
| <b>group_6798</b> | putative RNA-binding protein (contains KH domain)                |
| <b>group_6809</b> | hypothetical protein                                             |
| <b>group_6813</b> | Initiation-control protein YabA                                  |

|                   |                                                                     |
|-------------------|---------------------------------------------------------------------|
| <b>group_6823</b> | putative ribosomal protein                                          |
| <b>group_701</b>  | CutC-like protein                                                   |
| <b>group_770</b>  | putative ABC-type exoprotein transport system, permease component   |
| <b>group_7802</b> | hypothetical protein                                                |
| <b>group_7803</b> | hypothetical protein                                                |
| <b>group_7865</b> | preprotein translocase subunit SecA                                 |
| <b>group_7887</b> | hypothetical protein                                                |
| <b>group_7918</b> | hypothetical protein                                                |
| <b>group_794</b>  | Farnesyl diphosphate synthase                                       |
| <b>group_7985</b> | putative ABC transporter ATP-binding protein                        |
| <b>group_859</b>  | hypothetical protein                                                |
| <b>grpE</b>       | HSP-70 cofactor                                                     |
| <b>gtaB_1</b>     | UTP--glucose-1-phosphate uridylyltransferase                        |
| <b>guaA</b>       | GMP synthase [glutamine-hydrolyzing]                                |
| <b>guaB</b>       | Inosine-5'-monophosphate dehydrogenase                              |
| <b>guaB_2</b>     | putative manganese-dependent inorganic pyrophosphatase              |
| <b>guaC</b>       | GMP reductase                                                       |
| <b>hflK</b>       | Modulator of FtsH protease HflK                                     |
| <b>hflX</b>       | GTP-binding protein HflX                                            |
| <b>hom</b>        | Homoserine dehydrogenase                                            |
| <b>hprK</b>       | HPr kinase/phosphorylase                                            |
| <b>hpt</b>        | Hypoxanthine-guanine phosphoribosyltransferase                      |
| <b>hrcA</b>       | Heat-inducible transcription repressor HrcA                         |
| <b>hslO</b>       | hypothetical protein                                                |
| <b>hslR</b>       | Heat shock protein 15                                               |
| <b>ileS</b>       | Isoleucine--tRNA ligase                                             |
| <b>ilvE</b>       | Branched-chain-amino-acid aminotransferase                          |
| <b>ilvH</b>       | Putative acetolactate synthase small subunit                        |
| <b>infA</b>       | Translation initiation factor IF-1                                  |
| <b>infB</b>       | Translation initiation factor IF-2                                  |
| <b>infC</b>       | Translation initiation factor IF-3                                  |
| <b>iscS_1</b>     | Cysteine desulfurase                                                |
| <b>iscS_2</b>     | Cysteine desulfurase                                                |
| <b>ispD2</b>      | Putative 2-C-methyl-D-erythritol 4-phosphate cytidylyltransferase 2 |
| <b>lacB</b>       | Galactose-6-phosphate isomerase subunit LacB                        |
| <b>lacC_1</b>     | Tagatose-6-phosphate kinase                                         |
| <b>lacD</b>       | Tagatose 1,6-diphosphate aldolase                                   |
| <b>lacR_3</b>     | Lactose operon repressor                                            |
| <b>lagD</b>       | Lactococcin-G-processing and transport ATP-binding protein LagD     |
| <b>lcnD</b>       | Lactococcin A secretion protein LcnD                                |
| <b>lgt</b>        | Prolipoprotein diacylglyceryl transferase                           |
| <b>liaS</b>       | Sensor histidine kinase LiaS                                        |
| <b>livF</b>       | LIV-I protein F                                                     |
| <b>livH_1</b>     | LIV-I protein H                                                     |
| <b>livH_2</b>     | LIV-I protein H                                                     |
| <b>lon2</b>       | DNA repair protein RadA                                             |
| <b>lptB</b>       | Lipopolysaccharide export system ATP-binding protein LptB           |
| <b>lspA</b>       | Lipoprotein signal peptidase                                        |
| <b>luxS</b>       | S-ribosylhomocysteine lyase                                         |
| <b>lysA</b>       | Diaminopimelate decarboxylase                                       |

|               |                                                                     |
|---------------|---------------------------------------------------------------------|
| <b>lysS</b>   | Lysine--tRNA ligase                                                 |
| <b>malQ</b>   | 4-alpha-glucanotransferase                                          |
| <b>manX_1</b> | EIIAB-Man                                                           |
| <b>manZ_1</b> | PTS system mannose-specific EIID component                          |
| <b>map</b>    | Methionine aminopeptidase 1                                         |
| <b>marR</b>   | Multiple antibiotic resistance protein MarR                         |
| <b>mecA</b>   | Adapter protein MecA                                                |
| <b>mepA_2</b> | Multidrug export protein MepA                                       |
| <b>metF</b>   | 5,10-methylenetetrahydrofolate reductase                            |
| <b>metK</b>   | S-adenosylmethionine synthase                                       |
| <b>metQ</b>   | D-methionine-binding lipoprotein MetQ precursor                     |
| <b>mfd_1</b>  | Transcription-repair-coupling factor                                |
| <b>mgIA</b>   | Galactose/methyl galactoside import ATP-binding protein MglA        |
| <b>mglC</b>   | Galactoside transport system permease protein MglC                  |
| <b>mgsR</b>   | Modulator of the general stress response                            |
| <b>miaA</b>   | tRNA dimethylallyltransferase                                       |
| <b>misCB</b>  | Membrane protein YidC 1                                             |
| <b>mnmA</b>   | tRNA-specific 2-thiouridylase MnmA                                  |
| <b>mnmG</b>   | Glucose-inhibited division protein A                                |
| <b>mntB</b>   | Manganese transport system membrane protein MntB                    |
| <b>moeZ_1</b> | putative adenylyltransferase/sulfurtransferase MoeZ                 |
| <b>mraY</b>   | Phospho-N-acetylmuramoyl-pentapeptide-transferase                   |
| <b>mreC</b>   | Cell shape protein MreC                                             |
| <b>mrnC</b>   | Mini-ribonuclease 3                                                 |
| <b>mshA</b>   | D-inositol 3-phosphate glycosyltransferase                          |
| <b>msrAB</b>  | Peptide methionine sulfoxide reductase MsrA/MsrB                    |
| <b>mtnN</b>   | 5'-methylthioadenosine/S-adenosylhomocysteine nucleosidase          |
| <b>murA1</b>  | UDP-N-acetylglucosamine 1-carboxyvinyltransferase 1                 |
| <b>murC</b>   | UDP-N-acetylmuramate--L-alanine ligase                              |
| <b>murI</b>   | Glutamate racemase                                                  |
| <b>mutX_2</b> | 8-oxo-dGTP diphosphatase                                            |
| <b>nadE</b>   | NH(3)-dependent NAD( ) synthetase                                   |
| <b>nagA</b>   | N-acetylglucosamine-6-phosphate deacetylase                         |
| <b>nanA_2</b> | N-acetylneuraminate lyase                                           |
| <b>nfrA2</b>  | FMN reductase [NAD(P)H]                                             |
| <b>nifU</b>   | NifU-like protein                                                   |
| <b>nrdD_1</b> | Anaerobic ribonucleoside-triphosphate reductase                     |
| <b>nrdE2</b>  | Ribonucleoside-diphosphate reductase subunit alpha 2                |
| <b>nrdF</b>   | Ribonucleoside-diphosphate reductase 2 subunit beta                 |
| <b>nrdH</b>   | Glutaredoxin-like protein NrdH                                      |
| <b>nrdR</b>   | Transcriptional repressor NrdR                                      |
| <b>nusA</b>   | hypothetical protein                                                |
| <b>obg</b>    | Spo0B-associated GTP-binding protein                                |
| <b>opuCA</b>  | Carnitine transport ATP-binding protein OpuCA                       |
| <b>pabA</b>   | Para-aminobenzoate synthase glutamine amidotransferase component II |
| <b>pacS</b>   | Cation-transporting ATPase PacS                                     |
| <b>panT</b>   | Pantothenic acid ECF transporter S component PanT                   |
| <b>parE</b>   | DNA topoisomerase 4 subunit B                                       |
| <b>patA</b>   | Putative N-acetyl-LL-diaminopimelate aminotransferase               |
| <b>patB</b>   | Cystathionine beta-lyase PatB                                       |

|                |                                                                    |
|----------------|--------------------------------------------------------------------|
| <b>pbpF_2</b>  | Penicillin-binding protein F                                       |
| <b>pdg</b>     | UV-endonuclease                                                    |
| <b>pdp</b>     | Pyrimidine-nucleoside phosphorylase                                |
| <b>pdxK</b>    | Pyridoxine kinase                                                  |
| <b>pdxS</b>    | Pyridoxal biosynthesis lyase PdxS                                  |
| <b>pepA_2</b>  | Glutamyl aminopeptidase                                            |
| <b>pepN</b>    | Aminopeptidase N                                                   |
| <b>pfkA</b>    | 6-phosphofructokinase                                              |
| <b>pflA_1</b>  | Pyruvate formate-lyase 1-activating enzyme                         |
| <b>pflA_2</b>  | Pyruvate formate-lyase-activating enzyme                           |
| <b>pgcA</b>    | Phosphoglucomutase                                                 |
| <b>pgk</b>     | Phosphoglycerate kinase                                            |
| <b>pgl</b>     | 6-phosphogluconolactonase                                          |
| <b>pglF</b>    | UDP-N-acetyl-alpha-D-glucosamine C6 dehydratase                    |
| <b>pgsA</b>    | CDP-diacylglycerol--glycerol-3-phosphate 3-phosphatidyltransferase |
| <b>pheA</b>    | Prephenate dehydratase                                             |
| <b>plsX</b>    | Phosphate acyltransferase                                          |
| <b>plsY</b>    | G3P acyltransferase                                                |
| <b>pncB2</b>   | Nicotinate phosphoribosyltransferase pncB2                         |
| <b>pnp</b>     | Polyribonucleotide nucleotidyltransferase                          |
| <b>potB</b>    | Spermidine/putrescine transport system permease protein PotB       |
| <b>pox5</b>    | Pyruvate oxidase                                                   |
| <b>ppaC</b>    | putative manganese-dependent inorganic pyrophosphatase             |
| <b>ppnK</b>    | putative inorganic polyphosphate/ATP-NAD kinase                    |
| <b>prfA</b>    | Peptide chain release factor 1                                     |
| <b>prfB</b>    | Peptide chain release factor 2                                     |
| <b>priA</b>    | Primosomal protein N'                                              |
| <b>prmA</b>    | Ribosomal protein L11 methyltransferase                            |
| <b>proA</b>    | Gamma-glutamyl phosphate reductase                                 |
| <b>proB</b>    | Glutamate 5-kinase 1                                               |
| <b>prs</b>     | Ribose-phosphate pyrophosphokinase                                 |
| <b>prs2</b>    | Ribose-phosphate pyrophosphokinase 2                               |
| <b>psaA</b>    | Pneumococcal surface adhesin A                                     |
| <b>pspB</b>    | Putative phosphoserine phosphatase 2                               |
| <b>pstA</b>    | Phosphate transport system permease protein PstA                   |
| <b>pstB3_2</b> | Phosphate import ATP-binding protein PstB 3                        |
| <b>pth</b>     | Peptidyl-tRNA hydrolase                                            |
| <b>ptsH</b>    | Phosphocarrier protein HPr                                         |
| <b>puck</b>    | Uric acid permease Puck                                            |
| <b>purA</b>    | Adenylosuccinate synthetase                                        |
| <b>purC</b>    | Phosphoribosylaminoimidazole-succinocarboxamide synthase           |
| <b>purE</b>    | N5-carboxyaminoimidazole ribonucleotide mutase                     |
| <b>purF</b>    | Amidophosphoribosyltransferase precursor                           |
| <b>purK</b>    | N5-carboxyaminoimidazole ribonucleotide synthase                   |
| <b>purL</b>    | Phosphoribosylformylglycinamide synthase                           |
| <b>purM</b>    | Phosphoribosylformylglycinamide cyclo-ligase                       |
| <b>purR</b>    | Pur operon repressor                                               |
| <b>pyrB</b>    | Aspartate carbamoyltransferase                                     |
| <b>pyrC</b>    | Dihydroorotase                                                     |
| <b>pyrH</b>    | Uridylate kinase                                                   |

|               |                                                              |
|---------------|--------------------------------------------------------------|
| <b>pyrK</b>   | Dihydroorotate oxidase B, electron transfer subunit          |
| <b>pyrR</b>   | Bifunctional protein PyrR                                    |
| <b>queA</b>   | S-adenosylmethionine:tRNA ribosyltransferase-isomerase       |
| <b>rarA</b>   | Replication-associated recombination protein A               |
| <b>rbgA</b>   | Ribosome biogenesis GTPase A                                 |
| <b>recA</b>   | Recombinase A                                                |
| <b>recF</b>   | DNA replication and repair protein RecF                      |
| <b>recG</b>   | ATP-dependent DNA helicase RecG                              |
| <b>recN</b>   | Recombination protein N                                      |
| <b>recO</b>   | Recombination protein O                                      |
| <b>recR</b>   | Recombination protein RecR                                   |
| <b>rex</b>    | Redox-sensing transcriptional repressor rex                  |
| <b>ribU</b>   | Riboflavin ECF transporter S component RibU                  |
| <b>rimN</b>   | t(6)A37 threonylcarbamoyladenosine biosynthesis protein RimN |
| <b>rimP</b>   | hypothetical protein                                         |
| <b>rlmH</b>   | Ribosomal RNA large subunit methyltransferase H              |
| <b>rlmI</b>   | Ribosomal RNA large subunit methyltransferase I              |
| <b>rlmL</b>   | Ribosomal RNA large subunit methyltransferase K/L            |
| <b>rluB</b>   | Ribosomal large subunit pseudouridine synthase B             |
| <b>rluD_1</b> | Ribosomal large subunit pseudouridine synthase D             |
| <b>rluD_2</b> | Ribosomal large subunit pseudouridine synthase D             |
| <b>rnc</b>    | Ribonuclease 3                                               |
| <b>rnhC</b>   | Ribonuclease HIII                                            |
| <b>rnjA</b>   | Ribonuclease J 1                                             |
| <b>rnjB</b>   | Ribonuclease J 2                                             |
| <b>rnmV</b>   | Ribonuclease M5                                              |
| <b>rnpA</b>   | Ribonuclease P protein component                             |
| <b>rnr</b>    | Ribonuclease R                                               |
| <b>rny</b>    | Ribonuclease Y                                               |
| <b>rnz</b>    | Ribonuclease Z                                               |
| <b>rodA</b>   | Rod shape-determining protein RodA                           |
| <b>rpiA</b>   | Ribose-5-phosphate isomerase A                               |
| <b>rplA</b>   | 50S ribosomal protein L1                                     |
| <b>rplB</b>   | hypothetical protein                                         |
| <b>rplC</b>   | 50S ribosomal protein L3                                     |
| <b>rplD</b>   | 50S ribosomal protein L4                                     |
| <b>rplE</b>   | 50S ribosomal protein L5                                     |
| <b>rplF</b>   | hypothetical protein                                         |
| <b>rplI</b>   | hypothetical protein                                         |
| <b>rplJ</b>   | 50S ribosomal protein L10                                    |
| <b>rplK</b>   | 50S ribosomal protein L11                                    |
| <b>rplL</b>   | 50S ribosomal protein L7/L12                                 |
| <b>rplM</b>   | 50S ribosomal protein L13                                    |
| <b>rplN</b>   | 50S ribosomal protein L14                                    |
| <b>rplO</b>   | 50S ribosomal protein L15                                    |
| <b>rplP</b>   | 50S ribosomal protein L16                                    |
| <b>rplQ</b>   | hypothetical protein                                         |
| <b>rplR</b>   | hypothetical protein                                         |
| <b>rplS</b>   | 50S ribosomal protein L19                                    |
| <b>rplT</b>   | 50S ribosomal protein L20                                    |



|               |                                                   |
|---------------|---------------------------------------------------|
| <b>rplU</b>   | 50S ribosomal protein L21                         |
| <b>rplV</b>   | 50S ribosomal protein L22                         |
| <b>rplW</b>   | 50S ribosomal protein L23                         |
| <b>rplX</b>   | 50S ribosomal protein L24                         |
| <b>rpmA</b>   | 50S ribosomal protein L27                         |
| <b>rpmB</b>   | 50S ribosomal protein L28                         |
| <b>rpmC</b>   | 50S ribosomal protein L29                         |
| <b>rpmD</b>   | 50S ribosomal protein L30                         |
| <b>rpmE2</b>  | 50S ribosomal protein L31 type B                  |
| <b>rpmH</b>   | 50S ribosomal protein L34                         |
| <b>rpmI</b>   | 50S ribosomal protein L35                         |
| <b>rpmJ</b>   | Ribosomal protein II                              |
| <b>rpoA</b>   | DNA-directed RNA polymerase subunit alpha         |
| <b>rpoC</b>   | DNA-directed RNA polymerase subunit beta'         |
| <b>rpoZ</b>   | DNA-directed RNA polymerase subunit omega         |
| <b>rpsA_2</b> | 30S Ribosomal protein S1                          |
| <b>rpsB</b>   | 30S ribosomal protein S2                          |
| <b>rpsC</b>   | hypothetical protein                              |
| <b>rpsD</b>   | 30S ribosomal protein S4                          |
| <b>rpsE</b>   | hypothetical protein                              |
| <b>rpsF</b>   | 30S ribosomal protein S6                          |
| <b>rpsG</b>   | 30S ribosomal protein S7                          |
| <b>rpsH</b>   | 30S ribosomal protein S8                          |
| <b>rpsJ</b>   | hypothetical protein                              |
| <b>rpsK</b>   | 30S ribosomal protein S11                         |
| <b>rpsL</b>   | 30S ribosomal protein S12                         |
| <b>rpsM</b>   | hypothetical protein                              |
| <b>rpsP</b>   | 30S ribosomal protein S16                         |
| <b>rpsQ</b>   | hypothetical protein                              |
| <b>rpsR</b>   | 30S ribosomal protein S18                         |
| <b>rpsS</b>   | 30S ribosomal protein S19                         |
| <b>rpsT</b>   | 30S ribosomal protein S20                         |
| <b>rsfS</b>   | Ribosomal silencing factor RsfS                   |
| <b>rsgA</b>   | Putative ribosome biogenesis GTPase RsgA          |
| <b>rsmA</b>   | Ribosomal RNA small subunit methyltransferase A   |
| <b>rsmC</b>   | Ribosomal RNA small subunit methyltransferase C   |
| <b>rsmD</b>   | Ribosomal RNA small subunit methyltransferase D   |
| <b>rsmF</b>   | Ribosomal RNA small subunit methyltransferase F   |
| <b>rsmH</b>   | Ribosomal RNA small subunit methyltransferase H   |
| <b>rsml</b>   | Ribosomal RNA small subunit methyltransferase I   |
| <b>ruvA</b>   | Holliday junction ATP-dependent DNA helicase RuvA |
| <b>ruvB</b>   | Holliday junction ATP-dependent DNA helicase RuvB |
| <b>scpA</b>   | Segregation and condensation protein A            |
| <b>scpB</b>   | Segregation and condensation protein B            |
| <b>sdhA</b>   | L-serine dehydratase, alpha chain                 |
| <b>sdhB</b>   | L-serine dehydratase, beta chain                  |
| <b>serS</b>   | Serine--tRNA ligase                               |
| <b>sigA</b>   | Sigma-A                                           |
| <b>skfE</b>   | SkfA peptide export ATP-binding protein SkfE      |
| <b>smpB</b>   | SsrA-binding protein                              |

|               |                                                                     |
|---------------|---------------------------------------------------------------------|
| <b>spsB</b>   | Signal peptidase IB                                                 |
| <b>spxA_2</b> | Regulatory protein spx                                              |
| <b>ssb_1</b>  | Helix-destabilizing protein                                         |
| <b>ssuC</b>   | Putative aliphatic sulfonates transport permease protein SsuC       |
| <b>sufB_1</b> | FeS cluster assembly protein SufB                                   |
| <b>sugC</b>   | Trehalose import ATP-binding protein SugC                           |
| <b>suhB</b>   | Inositol-1-monophosphatase                                          |
| <b>tadA</b>   | tRNA-specific adenosine deaminase                                   |
| <b>tcyN</b>   | L-cystine import ATP-binding protein TcyN                           |
| <b>tdk</b>    | Thymidine kinase                                                    |
| <b>tgt</b>    | Queueine tRNA-ribosyltransferase                                    |
| <b>thil</b>   | putative tRNA sulfurtransferase                                     |
| <b>thiN</b>   | Thiamine pyrophosphokinase                                          |
| <b>thrB</b>   | Homoserine kinase                                                   |
| <b>thrC</b>   | Threonine synthase                                                  |
| <b>thyA</b>   | Thymidylate synthase                                                |
| <b>tig</b>    | Trigger factor                                                      |
| <b>tkt</b>    | Transketolase                                                       |
| <b>tlyA</b>   | Hemolysin A                                                         |
| <b>topA</b>   | DNA topoisomerase 1                                                 |
| <b>tpiA</b>   | Triosephosphate isomerase                                           |
| <b>tqsA_2</b> | pheromone autoinducer 2 transporter                                 |
| <b>trkA</b>   | Trk system potassium uptake protein TrkA                            |
| <b>trmB</b>   | tRNA (guanine-N(7)-)-methyltransferase                              |
| <b>trmFO</b>  | Methylenetetrahydrofolate--tRNA-(uracil-5-)-methyltransferase TrmFO |
| <b>trpB</b>   | Tryptophan synthase beta chain                                      |
| <b>trpC</b>   | Indole-3-glycerol phosphate synthase                                |
| <b>trpD</b>   | Anthranilate phosphoribosyltransferase                              |
| <b>trpE</b>   | Anthranilate synthase component 1                                   |
| <b>trpS2</b>  | Tryptophan--tRNA ligase 2                                           |
| <b>truA</b>   | tRNA pseudouridine synthase A                                       |
| <b>truB</b>   | tRNA pseudouridine synthase B                                       |
| <b>trxA</b>   | Thioredoxin                                                         |
| <b>tsf</b>    | Elongation factor Ts                                                |
| <b>tyrS</b>   | Tyrosine--tRNA ligase                                               |
| <b>udk</b>    | Uridine kinase                                                      |
| <b>ung</b>    | Uracil-DNA glycosylase                                              |
| <b>uppP</b>   | Undecaprenyl-diphosphatase                                          |
| <b>uppS</b>   | Isoprenyl transferase                                               |
| <b>uvrA</b>   | Excinuclease ABC subunit A                                          |
| <b>uvrB</b>   | Excinuclease ABC subunit B                                          |
| <b>uvrC</b>   | Excinuclease ABC subunit C                                          |
| <b>wcaJ</b>   | UDP-glucose:undecaprenyl-phosphate glucose-1-phosphate transferase  |
| <b>xerS</b>   | Tyrosine recombinase XerS                                           |
| <b>xseB</b>   | Exodeoxyribonuclease 7 small subunit                                |
| <b>yabJ</b>   | Enamine/imine deaminase                                             |
| <b>yajL</b>   | Chaperone protein YajL                                              |
| <b>ybaK</b>   | Cys-tRNA(Pro)/Cys-tRNA(Cys) deacylase YbaK                          |
| <b>ybeY</b>   | Endoribonuclease YbeY                                               |
| <b>ybjI</b>   | Flavin mononucleotide phosphatase YbjI                              |

|               |                                                                                 |
|---------------|---------------------------------------------------------------------------------|
| <b>ychF</b>   | Ribosome-binding ATPase YchF                                                    |
| <b>ydcV</b>   | Inner membrane ABC transporter permease protein YdcV                            |
| <b>ydfG</b>   | NADP-dependent 3-hydroxy acid dehydrogenase YdfG                                |
| <b>ydjZ</b>   | SNARE associated Golgi protein                                                  |
| <b>yecS_1</b> | Inner membrane amino-acid ABC transporter permease protein YecS                 |
| <b>yeeN</b>   | putative transcriptional regulatory protein YeeN                                |
| <b>yfcE</b>   | phosphodiesterase                                                               |
| <b>yfiC</b>   | N5-glutamine S-adenosyl-L-methionine-dependent methyltransferase                |
| <b>yhaM</b>   | 3'-5' exoribonuclease YhaM                                                      |
| <b>yhbY</b>   | RNA-binding protein YhbY                                                        |
| <b>yheH</b>   | putative multidrug resistance ABC transporter ATP-binding/permease protein YheH |
| <b>yheI_1</b> | putative ABC transporter ATP-binding protein                                    |
| <b>yheS_1</b> | putative ABC transporter ATP-binding protein YheS                               |
| <b>yigZ</b>   | IMPACT family member YigZ                                                       |
| <b>yjbM</b>   | GTP pyrophosphokinase YjbM                                                      |
| <b>yjjP</b>   | Inner membrane protein YjjP                                                     |
| <b>ykuL</b>   | CBS domain-containing protein YkuL                                              |
| <b>ykuR</b>   | N-acetyldiaminopimelate deacetylase                                             |
| <b>ykuT</b>   | putative MscS family protein YkuT                                               |
| <b>yrkK</b>   | Putative Holliday junction resolvase                                            |
| <b>ytpP</b>   | Thioredoxin-like protein YtpP                                                   |
| <b>ytrA</b>   | HTH-type transcriptional repressor YtrA                                         |
| <b>yumC</b>   | Ferredoxin--NADP reductase 2                                                    |
| <b>ywnA</b>   | Putative HTH-type transcriptional regulator YwnA                                |
| <b>yycF</b>   | Transcriptional regulatory protein YycF                                         |
| <b>yycJ</b>   | Putative metallo-hydrolase YycJ                                                 |
| <b>zwf</b>    | Glucose-6-phosphate 1-dehydrogenase                                             |
